# Supplementary material
Source: Elsevier journal article supplement (https://www.sciencedirect.com/science/article/pii/S2530064422000554)
Supplement: mmc1 [file S2530064422000554:mmc1.docx]

Table S1. Table showing the characteristics of each study analyzed. N_GA: Number of green areas; Min_area: minimum area of urban green spaces; Max_area: maximum area of urban green spaces.

| Author | Year | City | Latitude | Longitude | Altitude | N_GA | Period | Min_area | Max_area | Population |
| --- | --- | --- | --- | --- | --- | --- | --- | --- | --- | --- |
| AlmonteEspinosa | 2018 | Santo_Domingo | 18,47 | -69,88 | 14 | 4 | annual | 0,1 | 1000 | 2581827 |
| AmayaEspinel_et_al. | 2019 | Santiago_de_Chile | -33,45 | -70,67 | 520 | 60 | annual | 0,5 | 2 | 5428590 |
| AngaritaMartinez | 2002 | Santiago_de_Cali | 3,43 | -76,5 | 1018 | 15 | annual | 0,17 | 124,08 | 2119843 |
| Author | ined | Buenos_Aires | -34,58 | -58,37 | 25 | 23 | annual | 0,7 | 79,81 | 3075646 |
| Benitez_et_al. | 2021 | Ushuaia | -54,8 | -68,32 | 58 | 8 | seasonal | 0,8 | 3 | 56900 |
| Berget | 2006 | Bogotá | 4,6 | -74,07 | 2640 | 18 | seasonal | 0,01 | 121,35 | 6778691 |
| Bonança | 2014 | Jundiaí | -21,18 | -46,88 | 761 | 4 | annual | 11,9 | 50 | 401896 |
| CamargoBarbosa_et_al. | 2020 | San_Pablo | -23,5 | -46,63 | 772 | 27 | seasonal | 0,34 | 740 | 12000000 |
| CamposSilva | 2018 | Sorocaba | -23,5 | -47,45 | 601 | 28 | annual | 0,1 | 5,45 | 650000 |
| Cediel_LozanoFlorez | 2020 | Bucaramanga | 7,12 | -73,1 | 959 | 5 | annual | 1,16 | 12,08 | 500000 |
| Cespedes_et_al. | 2009 | Lambayeque | -6,7 | -79,9 | 24 | 17 | annual | 0,3 | 12 | 58276 |
| ChávezAlmonacid | 2014 | Valdivia | -39,8 | -73,23 | 14 | 15 | seasonal | 0,2 | 13,01 | 154095 |
| daSilva_et_al. | 2021 | Rio_Claro | -22,43 | -47,51 | 613 | 28 | annual | 0,1 | 0,77 | 204797 |
| Enedino_et_al. | 2018 | João_Pessoa | -7,08 | -34,83 | 37 | 8 | annual | 14,8 | 517,8 | 801718 |
| Faggi_Perepelizin | 2006 | Buenos_Aires | -34,58 | -58,37 | 25 | 6 | seasonal | 5,78 | 55,92 | 2776138 |
| Figini | 2019 | Mendoza | -32,88 | -68,83 | 769 | 24 | seasonal | 0,27 | 12,23 | 1086633 |
| Franchin | 2000 | Uberlandia | -18,92 | -48,27 | 863 | 5 | annual | 0,06 | 1,2 | 488000 |
| Garitano-Zavala_Gismondi | 2003 | La_Paz | -16,5 | -68,13 | 3625 | 27 | seasonal | 0,03 | 44 | 2415081 |
| GarizábalCarmona_ManceraRodríguez | 2021 | Medellín | 6,25 | -75,57 | 1495 | 20 | annual | 0,11 | 103,73 | 4000000 |
| Grose | 2013 | Joinville | -26,3 | -48,83 | 4 | 3 | annual | 50 | 390 | 515288 |
| Krügel_dos_Anjos | 2000 | Maringá | -25,42 | -51,93 | 555 | 5 | annual | 7,6 | 59 | 240292 |
| Leveau | 2021 | Tandil | -37,32 | -59,13 | 188 | 9 | annual | 1,16 | 6,61 | 116917 |
| Leveau | 2021 | Necochea | -38,5 | -58,73 | 16 | 5 | annual | 1,03 | 8,04 | 73557 |
| Leveau | 2021 | Miramar | -38,27 | -57,83 | 17 | 6 | annual | 0,36 | 6 | 29433 |
| Leveau | 2021 | Balcarce | -37,83 | -58,25 | 112 | 7 | annual | 0,57 | 6,05 | 38823 |
| Leveau | 2021 | Olavarría | -36,9 | -60,33 | 162 | 9 | annual | 0,25 | 3,36 | 89721 |
| Leveau | 2021 | Mar_del_Plata | -38 | -57,5 | 38 | 15 | annual | 0,21 | 4,56 | 656456 |
| Lima | 2020 | Manaus | -3,1 | -60,02 | 92 | 29 | annual | 2,43 | 696,61 | 2130264 |
| MartinEtchegaray_et_al. | 2018 | Asunción | -25,3 | -57,63 | 89 | 4 | seasonal | 5,8 | 282 | 515587 |
| Matarazzo-Neuberger | 1995 | San_Pablo | -23,5 | -46,63 | 772 | 5 | annual | 1,5 | 84,3 | 8493226 |
| Mella_Loutit | 2007 | Santiago_de_Chile | -33,45 | -70,67 | 520 | 5 | seasonal | 6,5 | 49,6 | 5428590 |
| MontenegroPazmiño | 2015 | Quito | -0,22 | -78,5 | 2850 | 16 | seasonal | 2,5 | 557 | 2239191 |
| MuñozPedreros_et_al. | 2018 | Temuco | -38,77 | -72,63 | 122 | 10 | annual | 0,9 | 17,4 | 287000 |
| NavaDíaz_et_al. | 2020 | Mérida | 20,9 | -89,6 | 14 | 22 | seasonal | 0,5 | 39,1 | 892363 |
| OliveiraMoreira | 2013 | Aracaju | -10,88 | -37,07 | 4 | 6 | annual | 0,12 | 280 | 570000 |
| Oppliger_et_al. | 2016 | Campo_Grande | -20,43 | -48,95 | 592 | 3 | annual | 2 | 116 | 786797 |
| ParreiraClaro_et_al. | 2020 | Quirinópolis | -18,43 | -50,45 | 75 | 10 | annual | 0,16 | 1,2 | 49416 |
| Ribeiro_dosSantosCristo | 2017 | Paragominas | -2,98 | -47,35 | 90 | 3 | seasonal | 7 | 13 | 97819 |
| RojasAllieri | 2014 | Guayaquil | -2,18 | -79,88 | 4 | 16 | seasonal | 0,81 | 119,86 | 2350915 |
| RoncónBarragán | 2009 | Bogotá | 4,6 | -74,07 | 2640 | 3 | seasonal | 48 | 155 | 6778691 |
| Sánchez-AizcorbeHennings | 2017 | Lima | -12,05 | -77,03 | 161 | 14 | seasonal | 5 | 89 | 8800000 |
| Scherer_et_al. | 2005 | Porto_Alegre | -30,02 | -51,22 | 10 | 8 | annual | 11,5 | 240 | 1300000 |
| Seijas_et_al. | 2011 | Guanare | 9,03 | -69,73 | 183 | 11 | annual | 0,12 | 15,18 | 140000 |
| Urquiza_Mella | 2002 | Santiago_de_Chile | -33,45 | -70,67 | 520 | 9 | seasonal | 2,8 | 58 | 5428590 |
| Vides-Hernández_ et_al. | 2017 | San_Salvador | 13,68 | -89,18 | 670 | 12 | seasonal | 0,46 | 41,97 | 2016000 |
| VieriraBraga | 2010 | Lavras | -21,23 | -45 | 919 | 7 | annual | 0,05 | 0,95 | 87421 |
| Villaseñor_Escobar | 2019 | Santiago_de_Chile | -33,45 | -70,67 | 520 | 6 | annual | 12,4 | 63,6 | 5428590 |
| Zorzal_et_al. | 2021 | Vitória | -20,17 | -40,3 | 4 | 7 | annual | 3 | 227,2 | 844475 |
| ZuñigaPalacios_et_al. | 2020 | Pachuca | 20,12 | -98,73 | 2382 | 15 | annual | 4,9 | 60 | 557093 |

References

Almonte-Espinosa, H. (2018). Composición, riqueza, diversidad y abundancia de Aves en cuatro áreas verdes de Santo Domingo. Novitates Caribaea, (12), 14-24.

Amaya-Espinel, J. D., Hostetler, M., Henriquez, C., & Bonacic, C. (2019). The influence of building density on Neotropical bird communities found in small urban parks. Landscape and Urban Planning, 190, 103578.

Angarita Martínez (2002) Composición y estructura de la avifauna de la ciudad de Cali. Thesis, Universidad del Valle, Santiago de Cali.

Benitez, J., Pizarro, J. C., Blazina, A. P., & Lencinas, M. V. (2020). Response of bird communities to native forest urbanization in one of the southernmost city of the world. Urban Forestry & Urban Greening, 126887.

Berget, C. (2006). Efecto del tamaño y de la cobertura vegetal de parques urbanos en la riqueza y diversidad de la avifauna de Bogotá, Colombia. Gestión y ambiente, 9(2), 45-60.

Bonança, R. A. (2014). Efeito da estrutura espacial de cobertura arbórea na comunidade de aves em parques urbanos no município de Jundiaí, SP. Thesis, Universidade Estadual Paulista “Júlio de Mesquita Filho”.

Campos Silva, L. A. (2018). Factors affecting bird fauna in patches of urban private forests in Southeastern Brazil. Thesis, Universidade Federal de São Carlos, São Carlos.

Cediel, F., & Lozano-Florez, A. J. (2020). Aves urbanas en zonas verdes del área metropolitana de Bucaramanga, Santander, Colombia. Ornitología Colombiana, (18).

Cespedes, j. L. C., E. A. Placencia, M. I. Carmona-Martinez, E. Edeval, P. Fernanadez (2009). Avifauna de la ciudad de Lambayeque. Thesis, Universidad Nacional Pedro Ruiz Gallo, Lambayeque.

Chávez, C. (2014). Relación entre la avifauna, la vegetación y las construcciones en plazas y parques de la ciudad de Valdivia. Thesis, Universidad Austral de Chile, Valdivia.

Claro HW, Rossi RF, Lopes WH (2020) Bird communities in urban habitat: the importance of vegetation in city squares. Revista Sapiência: Sociedade, Saberes e Práticas Educacionais 9, 201-217

da Silva, B. F., Pena, J. C., Viana-Junior, A. B., Vergne, M., & Pizo, M. A. (2021). Noise and tree species richness modulate the bird community inhabiting small public urban green spaces of a Neotropical city. Urban Ecosystems, 24(1), 71-81.

de Camargo Barbosa, K. V., Rodewald, A. D., Ribeiro, M. C., & Jahn, A. E. (2020). Noise level and water distance drive resident and migratory bird species richness within a Neotropical megacity. Landscape and Urban Planning, 197, 103769.

Enedino, T. R., Loures-Ribeiro, A., & Santos, B. A. (2018). Protecting biodiversity in urbanizing regions: the role of urban reserves for the conservation of Brazilian Atlantic Forest birds. Perspectives in Ecology and Conservation, 16(1), 17-23.

Faggi, A., & Perepelizin, P. (2006). Riqueza de aves a lo largo de un gradiente de urbanización en la ciudad de Buenos Aires. Revista del Museo Argentino de Ciencias Naturales nueva serie, 8(2), 289-297.

Franchin, A. G. (2000). Riqueza da avifauna urbana em praças de Uberlândia (MG). Thesis, Universidade Federal de Uberlândia, Uberlândia.

Garitano Zavala, Á., & Gismondi, P. (2003). Variación de la riqueza y diversidad de la ornitofauna en áreas verdes urbanas de las ciudades de La Paz y El Alto (Bolivia). Ecología en Bolivia, 38(1), 65-78.

Garizábal-Carmona, J. A., & Mancera-Rodríguez, N. J. (2021). Bird species richness across a Northern Andean city: Effects of size, shape, land cover, and vegetation of urban green spaces. Urban Forestry & Urban Greening, 64, 127243.

Grose, A. V. (2013). Avifauna em três unidades de conservação urbanas no município de Joinville, Santa Catarina, Brasil. Atualidades Ornitológicas, 175, 48-57.

Krügel, M. M., & Anjos, L. D. (2000). Bird communities in forest remnants in the city of Maringá, Paraná State, Southern Brazil. Ornitologia Neotropical, 11(4), 315-330.

Leveau, L. M. (2021). Big cities with small green areas hold a lower species richness and proportion of migrant birds: A global analysis. Urban Forestry & Urban Greening, 57, 126953.

Lima, N. (2020). Assembleias de aves em fragmentos florestais em uma grande metrópole tropical: os efeitos da estrutura da paisagem dependem da afinidade de habitat das espécies. Universidad Nacional do Amazonas, Manaus

Martin-Etchegaray, A., Esquivel, A., & Weiler, A. (2018). Estructura de las comunidades de aves de cuatro áreas verdes de la ciudad de Asunción, Paraguay. Revista de Ciencias Ambientales, 52(2).

Matarazzo-Neuberger, W. M. (1995). Comunidades de aves de cinco parques e praças da Grande São Paulo, Estado de São Paulo. Ararajuba, 3, 13-19.

Mella, J. E., & Loutit, A. (2007). Ecología comunitaria y reproductiva de aves en cerros islas y parques de Santiago. Boletín Chileno de Ornitología, 13, 13-27.

Montenegro Pazmiño, E. C. (2015). Diversidad de aves en áreas verdes de la ciudad de Quito, Ecuador . Thesis, Universidad San Francisco de Quito, Quito.

Muñoz-Pedreros, A., González-Urrutia, M., Encina-Montoya, F., & Norambuena, H. V. (2018). Effects of vegetation strata and human disturbance on bird diversity in green areas in a city in southern Chile. Avian Research, 9(1), 38.

Nava-Díaz, R., Pineda-López, R., & Dorantes-Euan, A. (2020). Drivers of Functional Composition of Bird Assemblages in Green Spaces of a Neotropical City: A Case Study From Merida, Mexico. Tropical Conservation Science, 13, 1940082920923896.

Oliveira-Moreira, A. L. D. O. (2013). Avifauna de uma área urbana no Nordeste brasileiro. Thesis, Univerisdad Estadual de Feira de Santana, Bahia

Oppliger, E. A., Fontoura, F. M., Oliveira, A. K. M. D., Toledo, M. C. B. D., Silva, M. H. S. D., & Guedes, N. M. R. (2016). O potencial turístico para a observação da avifauna em três áreas verdes na cidade de Campo Grande, MS. Revista Brasileira de Pesquisa em Turismo, 10(2), 274-292.

Ribeiro, J. S., & dos Santos Cristo, S. Comunidade de aves na zona urbana de Paragominas, Pará. Atualidades Ornitológicas, 198: 33-41.

Rincón-Barragan A. (2009) Composición y estructura del ensamblaje de aves presentes en tres campos de golf en la ciudad de Bogotá, D. C. Thesis, Pontificia Universidad Javeriana, Bogotá

Rojas Allieri, M. L. (2014). Diversidad y uso de hábitat de aves en diferentes gradientes urbanos en la ciudad de Guayaquil-Ecuador (Doctoral dissertation, Universidad de Guayaquil; Facultad de Ciencias Naturales).

Sánchez-Aizcorbe Hennings, V. (2017). ¿Qué tan saludables se encuentran nuestras áreas verdes? Estudio piloto usando diversidad de aves como indicador. Thesis, Universidad Peruana Cayetano Heredia, Lima.

Scherer, A., Scherer, S. B., Bugoni, L., Mohr, L. V., Efe, M. A., & Hartz, S. M. (2010). Estrutura trófica da Avifauna em oito parques da cidade de Porto Alegre, Rio Grande do Sul, Brasil. Ornithologia, 1(1), 25-32.

Seijas, A., Araujo Quintero, A., Salazar Gil, J. J., & Pérez Aranguren, D. (2011). Aves de la ciudad de Guanare, Portuguesa, Venezuela. Bol. Ctro. Inv. Biol, 45, 55-76.

Urquiza, A. & Mella, J. (2002). Riqueza y diversidad de aves en parques de Santiago durante el período estival. Boletín Chileno de Ornitología, 9(1), 12-21.

Vides-Hernández, G. L., Velado-Cano, M. A., Pablo-Cea, J. D., & Carmona-Galindo, V. D. (2017). Patrones de riqueza y diversidad de aves en áreas verdes del centro urbano de San Salvador, El Salvador. Huitzil, 18(2), 272-280.

Vierira-Braga, T., Zanzini, A. C. S., Cerboncini, R. A. S., Miguel, M., & Moura, A. S. (2010). Avifauna em praças da cidade de Lavras (MG): riqueza, similaridade e influência de variáveis do ambiente urbano. Revista Brasileira de Ornitologia, 18(1), 26-33.

Villaseñor, N. R., & Escobar, M. A. (2019). Cemeteries and biodiversity conservation in cities: how do landscape and patch-level attributes influence bird diversity in urban park cemeteries?. Urban Ecosystems, 22(6), 1037-1046.

Zorzal, R. R., Diniz, P., de Oliveira, R., & Duca, C. (2021). Drivers of avian diversity in urban greenspaces in the Atlantic Forest. Urban Forestry & Urban Greening, 59, 126908.

Zuñiga-Palacios, J., Zuria, I., Moreno, C. E., Almazán-Núñez, R. C., & González-Ledesma, M. (2020). Can small vacant lots become important reservoirs for birds in urban areas? A case study for a Latin American city. Urban Forestry & Urban Greening, 47, 126551.
