# Supplementary material
Source: Elsevier journal article supplement (https://www.sciencedirect.com/science/article/pii/S2530064422000554)
Supplement: mmc2 [file S2530064422000554:mmc2.docx]

Table S2. Main diet, habitat type and body mass (g) of the raptor species recorded in urban Green spaces of Neotropical cities. Bird: birds, gen: generalist, mam: mammals, repfish: reptiles and fish, scav: scavenger. Only species with two or more records.

| Species | Diet | Habitat | Mass |
| --- | --- | --- | --- |
| Accipiter_striatus | bird | closed | 130,59 |
| Asio_clamator | mam | closed | 443,28 |
| Asio_stygius | bird | closed | 565 |
| Athene_cunicularia | gen | open | 150,61 |
| Buteo_albonotatus | gen | semi | 745,92 |
| Buteo_brachyurus | bird | semi | 496,01 |
| Buteo_nitidus | repfish | closed | 519,04 |
| Buteo_platypterus | gen | closed | 453,65 |
| Buteogallus_urubitinga | gen | semi | 1152,87 |
| Caracara_cheriway | gen | semi | 1078,62 |
| Caracara_plancus | gen | semi | 1078,62 |
| Cathartes_aura | scav | open | 1518,24 |
| Cathartes_burrovianus | scav | semi | 935 |
| Coragyps_atratus | scav | open | 1881,69 |
| Elanoides_forficatus | inv | closed | 416,24 |
| Elanus_leucurus | mam | open | 346 |
| Falco_columbarius | bird | semi | 188,5 |
| Falco_femoralis | bird | semi | 335,76 |
| Falco_peregrinus | bird | open | 759,95 |
| Falco_rufigularis | gen | closed | 163,64 |
| Falco_sparverius | gen | semi | 114,61 |
| Geranoaetus_albicaudatus | gen | semi | 885 |
| Geranoaetus_polyosoma | mam | semi | 782,61 |
| Geranospiza_caerulescens | gen | closed | 302,5 |
| Glaucidium_brasilianum | inv | semi | 75,1 |
| Glaucidium_nanum | inv | semi | 73,7 |
| Glaucidium_peruanum | gen | closed | 62,41 |
| Harpagus_diodon | inv | closed | 200 |
| Herpetotheres_cachinnans | repfish | semi | 623,58 |
| Ictinia_plumbea | inv | closed | 249,9 |
| Megascops_choliba | inv | closed | 132 |
| Milvago_chimachina | gen | semi | 315,21 |
| Pandion_haliaetus | repfish | open | 1483,2 |
| Parabuteo_unicinctus | gen | semi | 850,28 |
| Phalcoboenus_chimango | gen | semi | 296 |
| Rosthramus_sociabilis | inv | open | 366,94 |
| Rupornis_magnirostris | gen | semi | 269 |
| Tyto_alba | mam | open | 403,32 |
