# Supplementary material
Source: Elsevier journal article supplement (https://www.sciencedirect.com/science/article/pii/S2530064422000554)
Supplement: mmc3 [file S2530064422000554:mmc3.docx]

Table S3. List of species recorded in the studies and number of times the species were recorded in the studies. Species in bold were included in the dbRDA (Figure 3) and the fourth corner analysis.

| Species | Code | Frequency |
| --- | --- | --- |
| *Accipiter_bicolor* | | 1 |
| ***Accipiter_striatus*** | **Acc_str** | 2 |
| ***Asio_clamator*** | **Asi_cla** | 2 |
| ***Asio_stygius*** | **Asi_sty** | 2 |
| ***Athene_cunicularia*** | **Ath_cun** | 10 |
| *Bubo_virginianus* | | 1 |
| ***Buteo_albonotatus*** | **But_alb** | 2 |
| ***Buteo_brachyurus*** | **But_bra** | 5 |
| *Buteo_jamaicensis* | | 1 |
| ***Buteo_nitidus*** | **But_nit** | 4 |
| *Buteo_plagiatus* | | 1 |
| ***Buteo_platypterus*** | **But_plat** | 3 |
| *Buteo_swainsoni* | | 1 |
| *Buteogallus_lacernulatus* | | 1 |
| *Buteogallus_meridionalis* | | 1 |
| ***Buteogallus_urubitinga*** | **But_uru** | 2 |
| ***Caracara_cheriway*** | **Car_che** | 2 |
| ***Caracara_plancus*** | **Car_pla** | 17 |
| ***Cathartes_aura*** | **Cat_aur** | 12 |
| ***Cathartes_burrovianus*** | **Cat_bur** | 4 |
| *Cathartes_melambrotus* | | 1 |
| *Ciccaba_nigrolineata* | | 1 |
| ***Coragyps_atratus*** | **Cor_atr** | 26 |
| ***Elanoides_forficatus*** | **Elan_for** | 3 |
| ***Elanus_leucurus*** | **Ela_leu** | 8 |
| ***Falco_columbarius*** | **Fal_col** | 2 |
| ***Falco_femoralis*** | **Falc_fem** | 13 |
| ***Falco_peregrinus*** | **Falc_per** | 6 |
| ***Falco_rufigularis*** | **Falc_ruf** | 5 |
| ***Falco_sparverius*** | **Falc_spa** | 23 |
| *Gampsonyx_swainsonii* | | 1 |
| ***Geranoaetus_albicaudatus*** | **Ger_alb** | 2 |
| ***Geranoaetus_polyosoma*** | **Ger_pol** | 5 |
| ***Geranospiza_caerulescens*** | **Ger_cae** | 2 |
| ***Glaucidium_brasilianum*** | **Gla_bra** | 4 |
| *Glaucidium_hardyi* | | 1 |
| ***Glaucidium_nanum*** | **Gla_nan** | 2 |
| ***Glaucidium_peruanum*** | **Gla_per** | 3 |
| ***Harpagus_diodon*** | **Har_dio** | 2 |
| ***Herpetotheres_cachinnans*** | **Her_cac** | 2 |
| ***Ictinia_plumbea*** | **Ict_plu** | 2 |
| *Leucopternis_melanops* | | 1 |
| *Lophostrix_cristata* | | 1 |
| *Megascops_atricapilla* | | 1 |
| ***Megascops_choliba*** | **Meg_cho** | 4 |
| *Megascops_sanctaecatarinae* | | 1 |
| *Micrastur_gilvicollis* | | 1 |
| ***Milvago_chimachina*** | **Mil_chi** | 16 |
| ***Pandion_haliaetus*** | **Pan_hal** | 4 |
| ***Parabuteo_unicinctus*** | **Par_uni** | 5 |
| ***Phalcoboenus_chimango*** | **Pha_chi** | 18 |
| *Phalcoboenus_megalopterus* | | 1 |
| *Pulsatrix_koeniswaldiana* | | 1 |
| *Pulsatrix_perspicillata* | | 1 |
| ***Rosthramus_sociabilis*** | **Ros_soc** | 2 |
| ***Rupornis_magnirostris*** | **Rup_mag** | 22 |
| *Spizaetus_tyrannus* | | 1 |
| *Strix_huhula* | | 1 |
| ***Tyto_alba*** | **Tyt_alb** | 4 |
